# Supplementary material for: The strategy of group embryo culture based on pronuclear pattern on blastocyst development: a two center analysis
Source: Springer Nature journal article supplement (doi:10.1007/s10815-014-0350-9), 2014-09-26
Supplement: MOESM1 [file 8900738]

| **Supplementary Table 1**. Differences between groups in each participating Center. | | | | | |
| --- | --- | --- | --- | --- | --- |
|  |  |  |  |  |  |
|  | Center A | |  | Center B | |
| Characteristics | Group "Random" | Group "Definite" |  | Group "Random" | Group "Definite" |
| n=43 | n=34 |  | n=37 | n=55 |
|  |  |  |  |  |  |
| Age (years) | 36.0 ± 4.0 | 37.0 ± 4.0 |  | 35.4 ± 3.6 | 35.3 ± 3.3 |
| Duration of infertility (months) | 48 ± 30 | 45 ± 18 |  | 32 ± 36 | 34 ± 24 |
| Day 3 serum FSH (IU/ml) | 7.0 ± 2.5 | 7.0 ± 2.2 |  | 7.0 ± 1.9 | 6.8 ± 1.6 |
| Total dose of administered FSH (IU) | 2144 ± 774 | 2100 ± 680 |  | 2756 ± 1157 | 2417 ± 1259 |
| Duration of stimulation (day) | 9.6 ± 1.3 | 10.2 ± 2.0 |  | 11.0 ± 1.9 | 10.9 ± 1.9 |
| Number of oocyte retrieved | 11.7 ± 4.2 | 12.9 ± 3.3 |  | 12.2 ± 3.4 | 12.5 ± 4.1 |
| Number of included zygotes | 322 | 260 |  | 272 | 389 |
| Number of blastocysts |  |  |  |  |  |
| Day 5 | 105 (33%) | 74 (29%) |  | 107 (39%) | 156 (40%) |
| Day 6 | 14 (4%) | 15 (6%) |  | 25 (9%) | 23 (6%) |
| Total | 119 (37%) | 89 (34%) |  | 132 (49%) | 179 (46%) |
| Number of top quality blastocysts | 89 (28%) | 61 (24%) |  | 101 (37%) | 142 (37%) |
| CPR, cumulative | 25/43 (58%) | 14/34 (41%) |  | 21/37 (57%) | 25/55 (46%) |
| IR, cumulative | 25/71 (35%) | 15/67 (22%) |  | 27/82 (33%) | 30/116 (26%) |
|  |  |  |  |  |  |
| Data are reported as mean ± standard deviation or Number (percentage). CPR: Clinical Pregnancy Rate per patient; IR: Implantation Rate. | | | | | |
|
